# Supplementary material for: Genetic diversity and differentiation of the rhesus macaque (Macaca mulatta) population in western Sichuan, China, based on the second exon of the major histocompatibility complex class II DQB (MhcMamu-DQB1) alleles
Source: PubMed Central journal article supplement (PMC4070090; doi:10.1186/1471-2148-14-130), 2014-06-14
Supplement: 1471-2148-14-130-S1.pdf [file 1471-2148-14-130-S1.pdf]

**Table S1.** *Mhc-DQB1* alleles of different primate species used in this study

| Allele name                      | IPD Acc No <sup>1</sup> | Allele name               | IPD Acc No <sup>1</sup> |
|----------------------------------|-------------------------|---------------------------|-------------------------|
| <i>Mamu-DQB1*06:01</i>           | MHC00398                | <i>Mafa-DQB1*06:09</i>    | MHC00285                |
| <i>Mamu-DQB1*06:02:01</i>        | MHC00399                | <i>Mafa-DQB1*06:10</i>    | MHC00286                |
| <i>Mamu-DQB1*06:02:02</i>        | MHC03494                | <i>Mafa-DQB1*06:11</i>    | MHC00287                |
| <i>Mamu-DQB1*06:02:03</i>        | MHC04024                | <i>Mafa-DQB1*06:12</i>    | MHC00288                |
| <b><i>Mamu-DQB1*06:05</i></b>    | MHC00400                | <i>Mafa-DQB1*06:13</i>    | MHC00289                |
| <b><i>Mamu-DQB1*06:06</i></b>    | MHC00401                | <i>Mafa-DQB1*06:14</i>    | MHC00290                |
| <b><i>Mamu-DQB1*06:07</i></b>    | MHC00402                | <i>Mafa-DQB1*06:15</i>    | MHC01188                |
| <i>Mamu-DQB1*06:08</i>           | MHC00403                | <i>Mafa-DQB1*06:16</i>    | MHC03518                |
| <i>Mamu-DQB1*06:09</i>           | MHC00404                | <i>Mafa-DQB1*06:17:01</i> | MHC03519                |
| <b><i>Mamu-DQB1*06:10</i></b>    | MHC00405                | <i>Mafa-DQB1*06:18</i>    | MHC03521                |
| <b><i>Mamu-DQB1*06:11:01</i></b> | MHC00406                | <i>Mafa-DQB1*06:19</i>    | MHC03522                |
| <b><i>Mamu-DQB1*06:11:02</i></b> | MHC00407                | <i>Mafa-DQB1*06:20</i>    | MHC03523                |
| <i>Mamu-DQB1*06:12</i>           | MHC00408                | <i>Mafa-DQB1*06:21</i>    | MHC03524                |
| <b><i>Mamu-DQB1*06:13:01</i></b> | MHC00409                | <i>Mafa-DQB1*06:22</i>    | MHC03525                |
| <i>Mamu-DQB1*06:13:02</i>        | MHC02196                | <i>Mafa-DQB1*06:23</i>    | MHC03526                |
| <b><i>Mamu-DQB1*06:14</i></b>    | MHC01626                | <i>Mafa-DQB1*06:24</i>    | MHC03527                |
| <i>Mamu-DQB1*06:15</i>           | MHC02192                | <i>Mafa-DQB1*06:25</i>    | MHC03528                |
| <i>Mamu-DQB1*06:16</i>           | MHC02350                | <i>Mafa-DQB1*06:26</i>    | MHC03529                |
| <b><i>Mamu-DQB1*06:17</i></b>    | MHC02905                | <i>Mafa-DQB1*06:27</i>    | MHC03698                |
| <i>Mamu-DQB1*06:18</i>           | MHC03495                | <i>Mafa-DQB1*06:28</i>    | MHC03699                |
| <i>Mamu-DQB1*06:19</i>           | MHC03496                | <i>Mafa-DQB1*06:29</i>    | MHC03700                |
| <i>Mamu-DQB1*06:20</i>           | MHC04013                | <i>Mafa-DQB1*06:30</i>    | MHC03701                |
| <i>Mamu-DQB1*06:21</i>           | MHC04014                | <i>Mafa-DQB1*06:31</i>    | MHC03777                |
| <i>Mamu-DQB1*06:22</i>           | MHC04015                | <i>Mafa-DQB1*06:32</i>    | MHC03779                |
| <b><i>Mamu-DQB1*15:01</i></b>    | MHC00410                | <i>Mafa-DQB1*06:33</i>    | MHC03888                |
| <b><i>Mamu-DQB1*15:02</i></b>    | MHC00411                | <i>Mafa-DQB1*06:34</i>    | MHC03889                |
| <b><i>Mamu-DQB1*15:03</i></b>    | MHC00412                | <i>Mafa-DQB1*06:35</i>    | MHC04715                |
| <i>Mamu-DQB1*15:04</i>           | MHC02193                | <i>Mafa-DQB1*06:36</i>    | MHC05121                |
| <i>Mamu-DQB1*15:05</i>           | MHC04025                | <i>Mafa-DQB1*15:01</i>    | MHC00291                |
| <b><i>Mamu-DQB1*16:01</i></b>    | MHC00413                | <i>Mafa-DQB1*15:02</i>    | MHC00292                |
| <i>Mamu-DQB1*16:02</i>           | MHC00414                | <i>Mafa-DQB1*15:03</i>    | MHC00293                |
| <i>Mamu-DQB1*16:03:01</i>        | MHC00415                | <i>Mafa-DQB1*15:04</i>    | MHC03778                |
| <i>Mamu-DQB1*16:03:02</i>        | MHC03880                | <i>Mafa-DQB1*16:01</i>    | MHC00294                |
| <i>Mamu-DQB1*17:02</i>           | MHC00416                | <i>Mafa-DQB1*16:02</i>    | MHC03447                |
| <b><i>Mamu-DQB1*17:03</i></b>    | MHC00417                | <i>Mafa-DQB1*16:03</i>    | MHC03697                |
| <i>Mamu-DQB1*17:04</i>           | MHC00418                | <i>Mafa-DQB1*17:01</i>    | MHC00295                |
| <i>Mamu-DQB1*17:05</i>           | MHC00419                | <i>Mafa-DQB1*17:02:01</i> | MHC00296                |
| <b><i>Mamu-DQB1*17:06:01</i></b> | MHC00420                | <i>Mafa-DQB1*17:02:02</i> | MHC04132                |
| <i>Mamu-DQB1*17:06:02</i>        | MHC03500                | <i>Mafa-DQB1*17:03</i>    | MHC00297                |
| <i>Mamu-DQB1*17:07</i>           | MHC00421                | <i>Mafa-DQB1*17:04</i>    | MHC00298                |
| <b><i>Mamu-DQB1*17:09</i></b>    | MHC00423                | <i>Mafa-DQB1*17:05</i>    | MHC00299                |
| <i>Mamu-DQB1*17:10</i>           | MHC01277                | <i>Mafa-DQB1*17:06:01</i> | MHC03445                |
| <i>Mamu-DQB1*17:11</i>           | MHC02194                | <i>Mafa-DQB1*17:06:02</i> | MHC03446                |
| <i>Mamu-DQB1*17:12</i>           | MHC03499                | <i>Mafa-DQB1*17:07:01</i> | MHC03438                |
| <i>Mamu-DQB1*17:13</i>           | MHC04026                | <i>Mafa-DQB1*17:07:02</i> | MHC03513                |
| <b><i>Mamu-DQB1*18:01</i></b>    | MHC00424                | <i>Mafa-DQB1*17:08:01</i> | MHC03516                |
| <i>Mamu-DQB1*18:02</i>           | MHC00425                | <i>Mafa-DQB1*17:08:02</i> | MHC03661                |
| <i>Mamu-DQB1*18:03</i>           | MHC00426                | <i>Mafa-DQB1*17:09</i>    | MHC03866                |
| <b><i>Mamu-DQB1*18:04</i></b>    | MHC00427                | <i>Mafa-DQB1*18:01:01</i> | MHC00300                |
| <i>Mamu-DQB1*18:07</i>           | MHC00428                | <i>Mafa-DQB1*18:01:02</i> | MHC03444                |
| <i>Mamu-DQB1*18:08</i>           | MHC00429                | <i>Mafa-DQB1*18:02</i>    | MHC00301                |
| <i>Mamu-DQB1*18:09</i>           | MHC00430                | <i>Mafa-DQB1*18:03</i>    | MHC00302                |
| <b><i>Mamu-DQB1*18:10</i></b>    | MHC00431                | <i>Mafa-DQB1*18:04</i>    | MHC00303                |
| <b><i>Mamu-DQB1*18:11</i></b>    | MHC00432                | <i>Mafa-DQB1*18:05</i>    | MHC00304                |

|                           |          |                           |          |
|---------------------------|----------|---------------------------|----------|
| <b>Mamu-DQB1*18:12</b>    | MHC00433 | <i>Mafa-DQB1*18:06</i>    | MHC00305 |
| <i>Mamu-DQB1*18:13</i>    | MHC00434 | <i>Mafa-DQB1*18:07</i>    | MHC00306 |
| <i>Mamu-DQB1*18:14</i>    | MHC00435 | <i>Mafa-DQB1*18:08</i>    | MHC00307 |
| <i>Mamu-DQB1*18:15</i>    | MHC01067 | <i>Mafa-DQB1*18:09</i>    | MHC03439 |
| <i>Mamu-DQB1*18:17</i>    | MHC02191 | <i>Mafa-DQB1*18:10</i>    | MHC03440 |
| <b>Mamu-DQB1*18:18</b>    | MHC02195 | <i>Mafa-DQB1*18:11</i>    | MHC03441 |
| <b>Mamu-DQB1*18:19</b>    | MHC02197 | <i>Mafa-DQB1*18:12</i>    | MHC03442 |
| <i>Mamu-DQB1*18:20</i>    | MHC02198 | <i>Mafa-DQB1*18:13</i>    | MHC03443 |
| <i>Mamu-DQB1*18:21</i>    | MHC02199 | <i>Mafa-DQB1*18:14</i>    | MHC03512 |
| <i>Mamu-DQB1*18:22</i>    | MHC02906 | <i>Mafa-DQB1*18:15</i>    | MHC03514 |
| <i>Mamu-DQB1*18:23</i>    | MHC03497 | <i>Mafa-DQB1*18:16</i>    | MHC03515 |
| <i>Mamu-DQB1*18:24</i>    | MHC03498 | <i>Mafa-DQB1*18:17</i>    | MHC03517 |
| <i>Mamu-DQB1*18:25</i>    | MHC03578 | <i>Mafa-DQB1*18:18</i>    | MHC03702 |
| <i>Mamu-DQB1*18:26N</i>   | MHC04027 | <i>Mafa-DQB1*18:19</i>    | MHC03703 |
| <i>Mamu-DQB1*24:01</i>    | MHC00436 | <i>Mafa-DQB1*18:20</i>    | MHC03776 |
| <i>Mafa-DQB1*06:01:01</i> | MHC00278 | <i>Mafa-DQB1*18:21</i>    | MHC03780 |
| <i>Mafa-DQB1*06:01:02</i> | MHC01623 | <i>Mafa-DQB1*18:22</i>    | MHC03863 |
| <i>Mafa-DQB1*06:02</i>    | MHC00279 | <i>Mafa-DQB1*18:23</i>    | MHC03864 |
| <i>Mafa-DQB1*06:03</i>    | MHC00280 | <i>Mafa-DQB1*18:24</i>    | MHC03865 |
| <i>Mafa-DQB1*06:04</i>    | MHC00281 | <i>Mafa-DQB1*18:25</i>    | MHC04240 |
| <i>Mafa-DQB1*06:06</i>    | MHC00282 | <i>Mafa-DQB1*18:28</i>    | MHC05119 |
| <i>Mafa-DQB1*06:07:01</i> | MHC00283 | <i>Mafa-DQB1*24:01</i>    | MHC00308 |
| <i>Mafa-DQB1*06:07:02</i> | MHC03520 | <i>Aona-DQB1*22:01:01</i> | MHC00006 |
| <i>Mafa-DQB1*06:08</i>    | MHC00284 | <i>Aona-DQB1*22:01:02</i> | MHC00007 |

Notes: A total of 156 *Mhc-DQB1* alleles from three primate species (*Macaca mulatta*, *Macaca fascicularis*, *Aotus nancymaae*) were used in this study, including 69 *Mamu-DQB1*, 85 *Mafa-DQB1* and 2 *Aona-DQB1* alleles. Alleles detected in this study are shown in bold. <sup>1</sup>IPD Acc No is accession number in the IPD-MHC Database (<http://www.ebi.ac.uk/ipd/mhc/>).
